# Supplementary material for: Photoinduced degradation of thermally stable Cs2AgBiBr6 double perovskites by micro-Raman studies
Source: Royal Society of Chemistry journal article supplement (doi:10.1039/d2ma00179a), 2022-01-01

## Photoinduced Degradation of Thermally Stable Cs<sub>2</sub>AgBiBr<sub>6</sub> Double Perovskites by Micro-Raman Studies

Athrey C Dakshinamurthy and C Sudakar\*

*Multifunctional Materials Laboratory, Department of Physics, Indian Institute of Technology Madras, Chennai-600036, India*

\*Corresponding author - [csudakar@iitm.ac.in](mailto:csudakar@iitm.ac.in)

### Supplementary information

**Figure S1:** XRD patterns of individually synthesized decomposition products (a) Cs<sub>3</sub>Bi<sub>2</sub>Br<sub>9</sub>, (b) BiOBr, (c) Cs<sub>3</sub>BiBr<sub>6</sub> and (d) CsAgBr<sub>2</sub>. (a) and (b) are indexed using the ICDD file 01-070-0493, 98-001-1207 respectively. Standard patterns for (c) and (d) are not available, however, the peaks

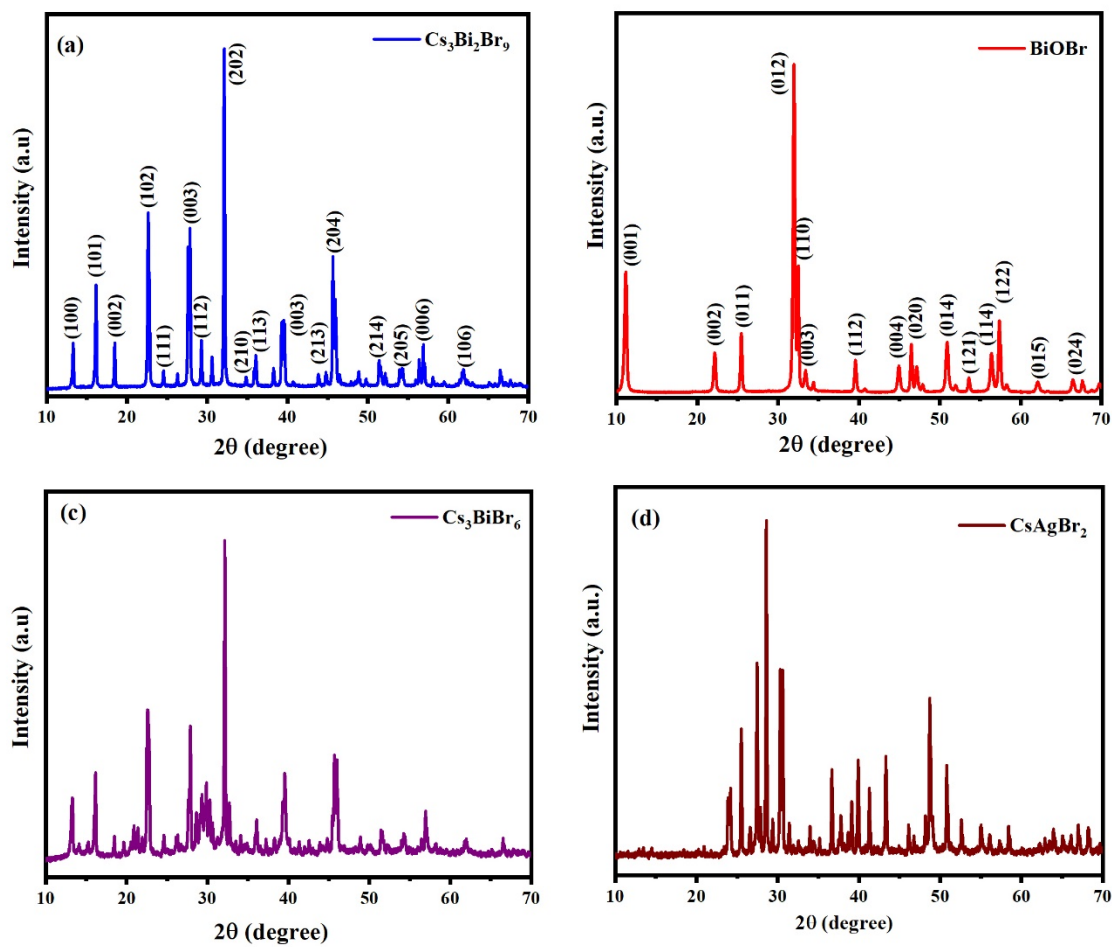

match predominantly with the patterns reported in (Small 2020, 16, 2004272)

**Figure S2:** Raman spectra of individually synthesized decomposition products (a)  $\text{Cs}_3\text{Bi}_2\text{Br}_9$ , (b)  $\text{BiOBr}$ , (c)  $\text{Cs}_3\text{BiBr}_6$  and (d)  $\text{CsAgBr}_2$

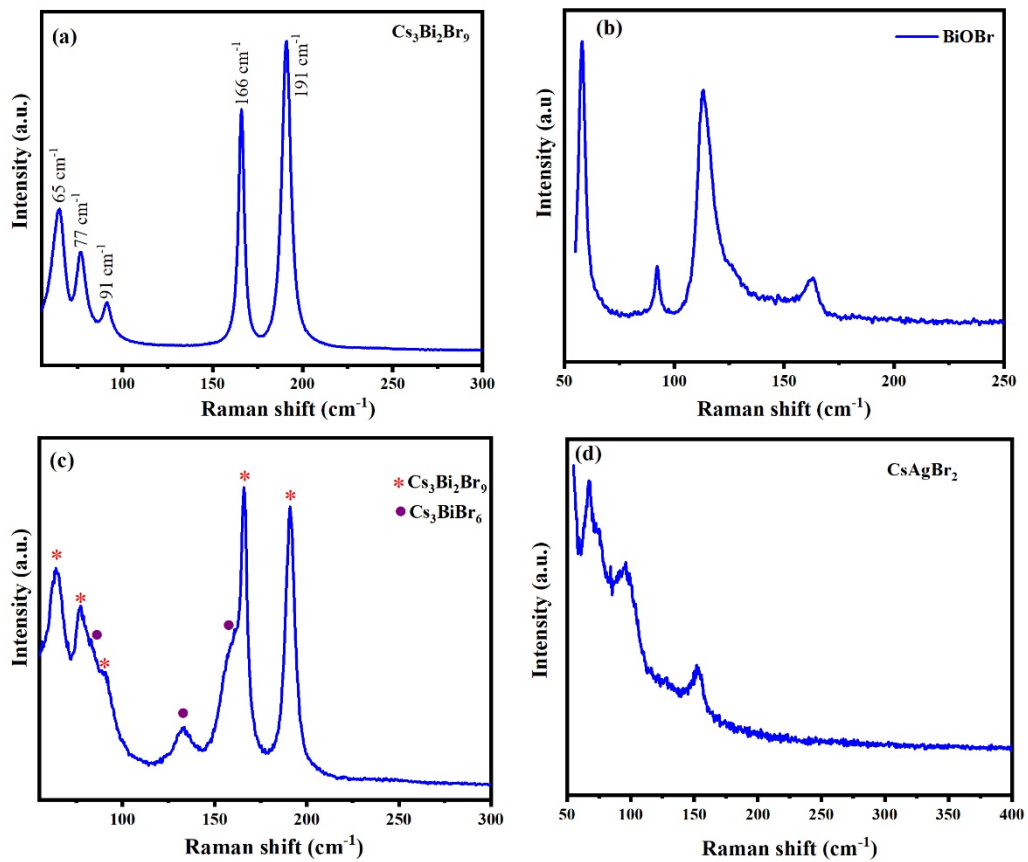

Supplement: d2ma00179a1.pdf [file d2ma00179a1.pdf]
